# Supplementary material
Source: PubMed Central journal article supplement (PMC4008249)
Supplement: NIHMS388893-supplement-Supplemental_Data.pdf [file NIHMS388893-supplement-Supplemental_Data.pdf]

## Supplementary Appendix

This appendix has been provided by the authors to give readers additional information about their work.

Supplement to: Zheng W, McLerran DF, Rolland B, et al. Association between body-mass index and risk of death in more than 1 million Asians. *N Engl J Med* 2011;364:719-29.

## Supplementary Materials

### Association between Body-Mass Index and Risk of Death in More Than 1 Million Asians Wei Zheng, et al.

#### Authors' contributions

Wei Zheng, Paolo Boffetta, and John Potter developed the concept and the plan for this project. Dale McLerran managed the pooled dataset and performed the statistical analysis in collaboration with Mark Thornquist and Ziding Feng. Betsy Rolland coordinated the project. Manami Inoue and Keitaro Matsuo coordinated the Japanese cohort studies. Daehee Kang and John Potter coordinated the Asia Cohort Consortium. Wei Zheng drafted the data analysis plan and the manuscript with significant contributions from Dale McLerran, Betsy Rolland, Xianglan Zhang, Ziding Feng, Paolo Boffetta, and John Potter. All other authors have conducted the original cohorts, provided data for the pooled analysis, and/or assisted in the data management. All authors reviewed and approved the final version of the manuscript.

#### Acknowledgements

The pooled analysis was funded by the Fred Hutchinson Cancer Research Center. Participating cohort studies (funding sources) in the consortium are as follows: the Mumbai Cohort Study [Mumbai, funding sources: International Agency for Research on Cancer, Clinical Trials Service Unit/ Oxford University, World Health Organization]; the Trivandrum Oral Cancer Screening (TOCS) Trial (funding sources: Association for International Cancer Research, St Andrews, UK, and Cancer Research UK); the Health Effects of Arsenic Longitudinal Study [Bangladesh, funding sources: NIH (P42ES010349, R01CA102484, R01CA107431)]; the China National Hypertension Survey Epidemiology Follow-up Study [CHEFS, funding sources: American Heart Association (9750612N), NHLBI (U01 HL072507), Chinese Academy of Medical Sciences]; the Shanghai Cohort Study [SCS, funding sources: NIH (R01CA0403092, R01CA144034)]; the Shanghai Men's Health Study [SMHS, funding sources: NIH (R01 CA 82729)]; the Shanghai Women's Health Study [SWHS, funding sources: NIH (R37 CA70867)]; the Community-Based Cancer Screening Project [CBCSP, funding sources: National Science Council and Department of Health, Taiwan]; CardioVascular Disease risk FACTor Two-township Study [CVDFACTS, funding sources: Department of Health, Taiwan (DOH80-27, DOH81-021, DOH8202-1027, DOH83-TD-015, and DOH84-TD-006)]; the Singapore Chinese Health Study [SCHS, funding sources: NIH (R01CA55069, R35CA53890, R01CA80205, R01CA144034)]; and the Korea Multi-center Cancer Cohort [KMCC, funding sources: Ministry of Education, Science and Technology, Korea (2009-0087452), National Research Foundation of Korea (2009-0087452)]. The Japanese cohorts: the Three Prefecture Cohort Study Aichi (3-Prefecture Aichi); the Ibaraki Prefectural Health Study; The Japanese Collaborative Cohort Study (JACC); the Japan Public Health Center-based Prospective Study (JPHC1, JPHC2); the Three Prefecture Cohort Study Miyagi (3-Prefecture Miyagi); the Miyagi Cohort Study (Miyagi); and the Ohsaki National Health Insurance Cohort Study (Ohsaki), are supported by the Grant-in-aid for Cancer Research, the Grant for the Third Term Comprehensive Control Research for Cancer, the Grant for Health Services, the Grant for Medical Services for Aged and Health Promotion, the Grant for Comprehensive Research on Cardiovascular and Life-style Related Diseases from the Ministry of Health, Labour and Welfare, Japan, and the Grant for Scientific Research from the Ministry of Education, Culture, Sports, Science and Technology, Japan.

Table S1. Hazard ratios (HR) for the association between BMI and total mortality by major study populations: The Asia Cohort Consortium BMI Project (males only)

|                                        | <b>Body mass index (BMI) at baseline</b> |                     |                     |                     |                     |                     |                     |                     |                     |                     |
|----------------------------------------|------------------------------------------|---------------------|---------------------|---------------------|---------------------|---------------------|---------------------|---------------------|---------------------|---------------------|
|                                        | ≤15.0                                    | 15.1-17.5           | 17.6-20.0           | 20.1-22.5           | 22.6-25.0           | 25.1-27.5           | 27.6-30.0           | 30.1-32.5           | 32.6-35.0           | 35.1-50.0           |
| <b>All subjects<sup>a</sup></b>        |                                          |                     |                     |                     |                     |                     |                     |                     |                     |                     |
| <b>East Asian</b>                      |                                          |                     |                     |                     |                     |                     |                     |                     |                     |                     |
| No. of deaths                          | 181                                      | 2102                | 8624                | 14,072              | 12,943              | 6127                | 2265                | 671                 | 169                 | 91                  |
| HR (95% CI) <sup>b</sup>               | 2.78<br>(1.76,4.42)                      | 1.94<br>(1.71,2.20) | 1.40<br>(1.28,1.52) | 1.13<br>(1.08,1.18) | 1.00<br>(reference) | 0.97<br>(0.93,1.00) | 1.05<br>(1.00,1.11) | 1.21<br>(1.09,1.34) | 1.63<br>(1.38,1.93) | 1.54<br>(1.23,1.93) |
| <b>Indian &amp; Bangladeshi</b>        |                                          |                     |                     |                     |                     |                     |                     |                     |                     |                     |
| No. of deaths                          | 403                                      | 1545                | 2206                | 2142                | 1530                | 764                 | 288                 | 109                 | 34                  | 23                  |
| HR (95% CI) <sup>b</sup>               | 2.23<br>(1.74,2.85)                      | 1.63<br>(1.39,1.91) | 1.27<br>(1.10,1.47) | 1.10<br>(0.95,1.27) | 1.00<br>(reference) | 0.98<br>(0.81,1.18) | 0.99<br>(0.75,1.31) | 1.14<br>(0.74,1.75) | 1.23<br>(0.58,2.61) | 1.70<br>(0.69,4.20) |
| <b>Ever smokers<sup>a</sup></b>        |                                          |                     |                     |                     |                     |                     |                     |                     |                     |                     |
| <b>East Asian</b>                      |                                          |                     |                     |                     |                     |                     |                     |                     |                     |                     |
| No. of deaths                          | 135                                      | 1664                | 6829                | 10,856              | 9429                | 4245                | 1465                | 407                 | 99                  | 57                  |
| HR (95% CI) <sup>b</sup>               | 2.50<br>(1.62,3.86)                      | 1.86<br>(1.67,2.07) | 1.39<br>(1.29,1.50) | 1.15<br>(1.10,1.19) | 1.00<br>(reference) | 0.97<br>(0.93,1.01) | 1.03<br>(0.97,1.09) | 1.18<br>(1.06,1.32) | 1.56<br>(1.19,2.04) | 1.70<br>(1.28,2.26) |
| <b>Indian &amp; Bangladeshi</b>        |                                          |                     |                     |                     |                     |                     |                     |                     |                     |                     |
| No. of deaths                          | 246                                      | 1007                | 1247                | 1045                | 663                 | 312                 | 114                 | 40                  | 8                   | 5                   |
| HR (95% CI) <sup>b</sup>               | 2.02<br>(1.45,2.80)                      | 1.59<br>(1.27,1.99) | 1.25<br>(1.01,1.55) | 1.14<br>(0.92,1.41) | 1.00<br>(reference) | 1.00<br>(0.74,1.34) | 1.00<br>(0.64,1.55) | 1.16<br>(0.57,2.35) | NA                  | NA                  |
| <b>Lifetime nonsmokers<sup>a</sup></b> |                                          |                     |                     |                     |                     |                     |                     |                     |                     |                     |
| <b>East Asian</b>                      |                                          |                     |                     |                     |                     |                     |                     |                     |                     |                     |
| No. of deaths                          | 44                                       | 379                 | 1504                | 2708                | 3076                | 1680                | 731                 | 248                 | 66                  | 25                  |
| HR (95% CI) <sup>b</sup>               | 2.99<br>(2.14,4.17)                      | 1.82<br>(1.44,2.29) | 1.22<br>(1.05,1.42) | 0.99<br>(0.93,1.05) | 1.00<br>(reference) | 0.99<br>(0.92,1.07) | 1.19<br>(1.06,1.34) | 1.58<br>(1.21,2.07) | 2.30<br>(1.65,3.20) | 1.59<br>(1.03,2.45) |
| <b>Indian &amp; Bangladeshi</b>        |                                          |                     |                     |                     |                     |                     |                     |                     |                     |                     |
| No. of deaths                          | 157                                      | 538                 | 959                 | 1097                | 867                 | 452                 | 174                 | 69                  | 26                  | 18                  |
| HR (95% CI) <sup>b</sup>               | 2.37<br>(1.62,3.45)                      | 1.55<br>(1.22,1.98) | 1.23<br>(1.01,1.52) | 1.06<br>(0.87,1.29) | 1.00<br>(reference) | 0.97<br>(0.75,1.24) | 1.01<br>(0.71,1.45) | 1.15<br>(0.67,1.98) | 1.46<br>(0.62,3.45) | 2.33<br>(0.11,48.1) |

<sup>a</sup> Included in the analysis were all subjects / ever smokers / lifetime nonsmokers from India and Bangladesh (125,706 / 53,672 / 72,034), and East Asian (341,359 / 237,290 / 97,315)

<sup>b</sup> Adjusted for age, gender, education, urban/rural resident, marital status, and baseline comorbidities and excluding subjects with less than three years of follow-up.

Table S2. Hazard ratios (HR) for the association between BMI and total mortality by major study populations: The Asia Cohort Consortium BMI Project (females only)

|                                        | <b>Body mass index (BMI) at baseline</b> |                     |                     |                     |                     |                     |                     |                     |                     |                     |
|----------------------------------------|------------------------------------------|---------------------|---------------------|---------------------|---------------------|---------------------|---------------------|---------------------|---------------------|---------------------|
|                                        | ≤15.0                                    | 15.1-17.5           | 17.6-20.0           | 20.1-22.5           | 22.6-25.0           | 25.1-27.5           | 27.6-30.0           | 30.1-32.5           | 32.6-35.0           | 35.1-50.0           |
| <b>All subjects<sup>a</sup></b>        |                                          |                     |                     |                     |                     |                     |                     |                     |                     |                     |
| East Asian                             |                                          |                     |                     |                     |                     |                     |                     |                     |                     |                     |
| No. of deaths                          | 275                                      | 1693                | 4923                | 7128                | 8448                | 4882                | 2414                | 952                 | 315                 | 192                 |
| HR (95% CI) <sup>b</sup>               | 2.34<br>(1.77,3.11)                      | 1.74<br>(1.53,1.98) | 1.28<br>(1.18,1.39) | 1.03<br>(0.98,1.09) | 1.00<br>(reference) | 1.00<br>(0.95,1.06) | 1.07<br>(1.00,1.15) | 1.19<br>(1.06,1.34) | 1.40<br>(1.19,1.64) | 1.52<br>(1.27,1.83) |
| Indian & Bangladeshi                   |                                          |                     |                     |                     |                     |                     |                     |                     |                     |                     |
| No. of deaths                          | 352                                      | 867                 | 1134                | 1054                | 819                 | 505                 | 249                 | 124                 | 30                  | 34                  |
| HR (95% CI) <sup>b</sup>               | 1.99<br>(1.51,2.63)                      | 1.55<br>(1.25,1.92) | 1.23<br>(1.01,1.51) | 1.08<br>(0.88,1.32) | 1.00<br>(reference) | 0.98<br>(0.77,1.25) | 0.89<br>(0.65,1.22) | 0.97<br>(0.64,1.47) | 0.66<br>(0.30,1.48) | 1.09<br>(0.51,2.31) |
| <b>Ever smokers<sup>a</sup></b>        |                                          |                     |                     |                     |                     |                     |                     |                     |                     |                     |
| East Asian                             |                                          |                     |                     |                     |                     |                     |                     |                     |                     |                     |
| No. of deaths                          | 56                                       | 326                 | 761                 | 881                 | 1021                | 488                 | 257                 | 124                 | 28                  | 25                  |
| HR (95% CI) <sup>b</sup>               | 2.07<br>(1.02,4.20)                      | 1.50<br>(1.17,1.93) | 1.20<br>(1.04,1.38) | 1.02<br>(0.92,1.13) | 1.00<br>(reference) | 0.94<br>(0.83,1.06) | 0.89<br>(0.76,1.04) | 1.18<br>(0.95,1.45) | 1.03<br>(0.68,1.58) | 1.64<br>(0.94,2.84) |
| Indian & Bangladeshi                   |                                          |                     |                     |                     |                     |                     |                     |                     |                     |                     |
| No. of deaths                          | 21                                       | 48                  | 30                  | 22                  | 15                  | 6                   | 2                   | 1                   | 1                   | 0                   |
| HR (95% CI) <sup>b</sup>               | 1.43<br>(0.25,8.20)                      | 1.37<br>(0.30,6.34) | 0.75<br>(0.15,3.74) | 0.88<br>(0.16,4.96) | 1.00<br>(reference) | NA                  | NA                  | NA                  | NA                  | NA                  |
| <b>Lifetime nonsmokers<sup>a</sup></b> |                                          |                     |                     |                     |                     |                     |                     |                     |                     |                     |
| East Asian                             |                                          |                     |                     |                     |                     |                     |                     |                     |                     |                     |
| No. of deaths                          | 203                                      | 1239                | 3776                | 5658                | 6849                | 4024                | 1982                | 769                 | 259                 | 154                 |
| HR (95% CI) <sup>b</sup>               | 2.36<br>(1.02,2.77)                      | 1.72<br>(1.53,1.94) | 1.26<br>(1.16,1.37) | 1.02<br>(0.97,1.09) | 1.00<br>(reference) | 1.00<br>(0.94,1.07) | 1.08<br>(1.01,1.15) | 1.18<br>(1.05,1.33) | 1.41<br>(1.20,1.65) | 1.64<br>(1.30,2.07) |
| Indian & Bangladeshi                   |                                          |                     |                     |                     |                     |                     |                     |                     |                     |                     |
| No. of deaths                          | 331                                      | 819                 | 1104                | 1031                | 804                 | 499                 | 247                 | 123                 | 29                  | 34                  |
| HR (95% CI) <sup>b</sup>               | 2.01<br>(1.51,2.68)                      | 1.54<br>(1.24,1.92) | 1.25<br>(1.02,1.53) | 1.08<br>(0.88,1.32) | 1.00<br>(reference) | 0.98<br>(0.77,1.26) | 0.90<br>(0.66,1.23) | 0.97<br>(0.64,1.48) | 0.65<br>(0.29,1.47) | 1.10<br>(0.52,2.34) |

<sup>a</sup> Included in the analysis were all subjects / ever smokers / lifetime nonsmokers from India and Bangladesh (139,330 / 1763 / 137,562) and East Asian (438,178/ 32,755/ 382,177)

<sup>b</sup> Adjusted for age, gender, education, urban/rural resident, marital status, and baseline comorbidities and excluding subjects with less than three years of follow-up.

Table S3. Hazard ratios (HR) for the association between BMI and cause-specific mortality by major study populations: The Asia Cohort Consortium BMI Project (ever-smokers only)

|                                   | <b>Body mass index (BMI) at baseline</b> |                     |                     |                     |                     |                     |                      |                     |
|-----------------------------------|------------------------------------------|---------------------|---------------------|---------------------|---------------------|---------------------|----------------------|---------------------|
|                                   | ≤17.5                                    | 17.6-20.0           | 20.1-22.5           | 22.6-25.0           | 25.1-27.5           | 27.6-30.0           | 30.1-32.5            | >32.5               |
| <b>CVD mortality</b>              |                                          |                     |                     |                     |                     |                     |                      |                     |
| East Asian <sup>a</sup>           |                                          |                     |                     |                     |                     |                     |                      |                     |
| No. of deaths                     | 646                                      | 2057                | 3090                | 3012                | 1445                | 542                 | 189                  | 73                  |
| HR (95% CI) <sup>b</sup>          | 1.41<br>(1.20,1.65)                      | 1.14<br>(1.03,1.26) | 1.01<br>(0.95,1.07) | 1.00<br>(reference) | 1.01<br>(0.92,1.11) | 1.04<br>(0.93,1.16) | 1.28<br>(1.09,1.51)  | 1.46<br>(1.04,2.04) |
| Indian & Bangladeshi <sup>a</sup> |                                          |                     |                     |                     |                     |                     |                      |                     |
| No. of deaths                     | 332                                      | 432                 | 440                 | 318                 | 142                 | 53                  | 17                   | 7                   |
| HR (95% CI) <sup>b</sup>          | 0.93<br>(0.64,1.34)                      | 0.96<br>(0.69,1.35) | 1.01<br>(0.72,1.40) | 1.00<br>(reference) | 0.95<br>(0.60,1.48) | 0.94<br>(0.48,1.84) | 1.18<br>(0.38,3.64)  | 0.94<br>(0.16,5.54) |
| <b>Cancer mortality</b>           |                                          |                     |                     |                     |                     |                     |                      |                     |
| East Asian <sup>a</sup>           |                                          |                     |                     |                     |                     |                     |                      |                     |
| No. of deaths                     | 524                                      | 2450                | 4158                | 3585                | 1493                | 541                 | 151                  | 62                  |
| HR (95% CI) <sup>b</sup>          | 1.32<br>(1.16,1.49)                      | 1.31<br>(1.20,1.43) | 1.15<br>(1.09,1.21) | 1.00<br>(reference) | 0.93<br>(0.86,1.00) | 1.02<br>(0.92,1.14) | 1.14<br>(0.95,1.37)  | 1.53<br>(1.11,2.11) |
| Indian & Bangladeshi <sup>a</sup> |                                          |                     |                     |                     |                     |                     |                      |                     |
| No. of deaths                     | 147                                      | 153                 | 114                 | 63                  | 37                  | 11                  | 6                    | 1                   |
| HR (95% CI) <sup>b</sup>          | 1.91<br>(0.94,3.88)                      | 1.55<br>(0.78,3.08) | 1.29<br>(0.63,2.63) | 1.00<br>(reference) | 1.22<br>(0.47,3.20) | 1.26<br>(0.30,5.22) | 2.43<br>(0.38,15.54) | NA                  |
| <b>Other mortality</b>            |                                          |                     |                     |                     |                     |                     |                      |                     |
| East Asian <sup>a</sup>           |                                          |                     |                     |                     |                     |                     |                      |                     |
| No. of deaths                     | 881                                      | 2458                | 3366                | 2767                | 1211                | 434                 | 133                  | 66                  |
| HR (95% CI) <sup>b</sup>          | 2.76<br>(2.38,3.19)                      | 1.70<br>(1.55,1.85) | 1.24<br>(1.14,1.35) | 1.00<br>(reference) | 0.96<br>(0.89,1.04) | 0.99<br>(0.89,1.11) | 1.12<br>(0.90,1.39)  | 1.85<br>(1.28,2.68) |
| Indian & Bangladeshi <sup>a</sup> |                                          |                     |                     |                     |                     |                     |                      |                     |
| No. of deaths                     | 931                                      | 778                 | 574                 | 336                 | 160                 | 61                  | 19                   | 7                   |
| HR (95% CI) <sup>b</sup>          | 2.39<br>(1.78,3.20)                      | 1.50<br>(1.12,2.02) | 1.23<br>(0.91,1.67) | 1.00<br>(reference) | 0.99<br>(0.65,1.51) | 1.00<br>(0.54,1.87) | 1.13<br>(0.40,3.15)  | 1.05<br>(0.20,5.48) |

<sup>a</sup>Included in the analysis were ever smokers in the groups of Indian and Bangladeshi (n=56,250) and East Asian (n=244,267).

<sup>b</sup> Adjusted for age, gender, education, urban/rural resident, marital status, and baseline comorbidities, and excluding subjects with less than three years of follow-up.

Table S4. Hazard ratios (HR) for the association between BMI and cause-specific mortality by major study populations: The Asia Cohort Consortium BMI Project (lifetime nonsmokers only)

|                                   | <b>Body mass index (BMI) at baseline</b> |                     |                     |                     |                     |                     |                     |                     |
|-----------------------------------|------------------------------------------|---------------------|---------------------|---------------------|---------------------|---------------------|---------------------|---------------------|
|                                   | ≤17.5                                    | 17.6-20.0           | 20.1-22.5           | 22.6-25.0           | 25.1-27.5           | 27.6-30.0           | 30.1-32.5           | >32.5               |
| <b>CVD mortality</b>              |                                          |                     |                     |                     |                     |                     |                     |                     |
| East Asian <sup>a</sup>           |                                          |                     |                     |                     |                     |                     |                     |                     |
| No. of deaths                     | 611                                      | 1727                | 2468                | 3043                | 1688                | 837                 | 342                 | 191                 |
| HR (95% CI) <sup>b</sup>          | 1.51<br>(1.36,1.67)                      | 1.16<br>(0.98,1.36) | 0.97<br>(0.89,1.05) | 1.00<br>(reference) | 0.98<br>(0.92,1.05) | 1.08<br>(0.98,1.19) | 1.34<br>(1.10,1.62) | 1.56<br>(1.32,1.84) |
| Indian & Bangladeshi <sup>a</sup> |                                          |                     |                     |                     |                     |                     |                     |                     |
| No. of deaths                     | 456                                      | 667                 | 836                 | 683                 | 426                 | 181                 | 84                  | 41                  |
| HR (95% CI) <sup>b</sup>          | 1.02<br>(0.78,1.35)                      | 1.01<br>(0.79,1.29) | 1.02<br>(0.81,1.28) | 1.00<br>(reference) | 1.07<br>(0.81,1.41) | 0.99<br>(0.68,1.44) | 1.10<br>(0.66,1.84) | 1.04<br>(0.51,2.10) |
| <b>Cancer mortality</b>           |                                          |                     |                     |                     |                     |                     |                     |                     |
| East Asian <sup>a</sup>           |                                          |                     |                     |                     |                     |                     |                     |                     |
| No. of deaths                     | 304                                      | 1218                | 2330                | 2948                | 1697                | 786                 | 284                 | 131                 |
| HR (95% CI) <sup>b</sup>          | 1.17<br>(1.01,1.35)                      | 1.01<br>(0.93,1.09) | 0.95<br>(0.90,1.01) | 1.00<br>(reference) | 1.04<br>(0.97,1.11) | 1.16<br>(1.06,1.27) | 1.28<br>(1.10,1.50) | 1.48<br>(1.22,1.80) |
| Indian & Bangladeshi <sup>a</sup> |                                          |                     |                     |                     |                     |                     |                     |                     |
| No. of deaths                     | 108                                      | 161                 | 176                 | 179                 | 93                  | 40                  | 17                  | 5                   |
| HR (95% CI) <sup>b</sup>          | 0.91<br>(0.52,1.59)                      | 0.88<br>(0.54,1.45) | 0.83<br>(0.52,1.33) | 1.00<br>(reference) | 0.87<br>(0.49,1.55) | 0.74<br>(0.34,1.65) | 0.70<br>(0.21,2.32) | 0.43<br>(0.05,3.77) |
| <b>Other mortality</b>            |                                          |                     |                     |                     |                     |                     |                     |                     |
| East Asian <sup>a</sup>           |                                          |                     |                     |                     |                     |                     |                     |                     |
| No. of deaths                     | 843                                      | 1897                | 2552                | 2731                | 1462                | 700                 | 261                 | 131                 |
| HR (95% CI) <sup>b</sup>          | 2.76<br>(2.23,3.42)                      | 1.54<br>(1.34,1.76) | 1.12<br>(1.01,1.24) | 1.00<br>(reference) | 0.98<br>(0.88,1.10) | 1.10<br>(0.95,1.26) | 1.17<br>(0.98,1.41) | 1.47<br>(1.10,1.96) |
| Indian & Bangladeshi <sup>a</sup> |                                          |                     |                     |                     |                     |                     |                     |                     |
| No. of deaths                     | 1438                                     | 1365                | 1275                | 911                 | 493                 | 227                 | 103                 | 67                  |
| HR (95% CI) <sup>b</sup>          | 2.24<br>(1.84,2.72)                      | 1.46<br>(1.20,1.77) | 1.15<br>(0.95,1.40) | 1.00<br>(reference) | 0.93<br>(0.73,1.20) | 0.95<br>(0.69,1.32) | 1.03<br>(0.65,1.63) | 1.21<br>(0.69,2.13) |

<sup>a</sup>Included in the analysis were lifetime nonsmokers in the groups of Indian and Bangladeshi (n=211,646) and East Asian (n=415,166).

<sup>b</sup>Adjusted for age, gender, education, urban/rural resident, marital status, and baseline comorbidities, and excluding subjects with less than three years of follow-up.

Figure S1. Hazard ratios (HR) for the association between BMI and mortality due to respiratory diseases, by smoking status, the Asia Cohort Consortium BMI project. Two figures are presented for each population (A and C for East Asians; B and D for Indians/Bangladeshis), one with and one without confidence interval bars. HRs were adjusted for age, gender, education, urban/rural resident, marital status, and baseline comorbidities and excluding subjects with less than three years of follow-up.

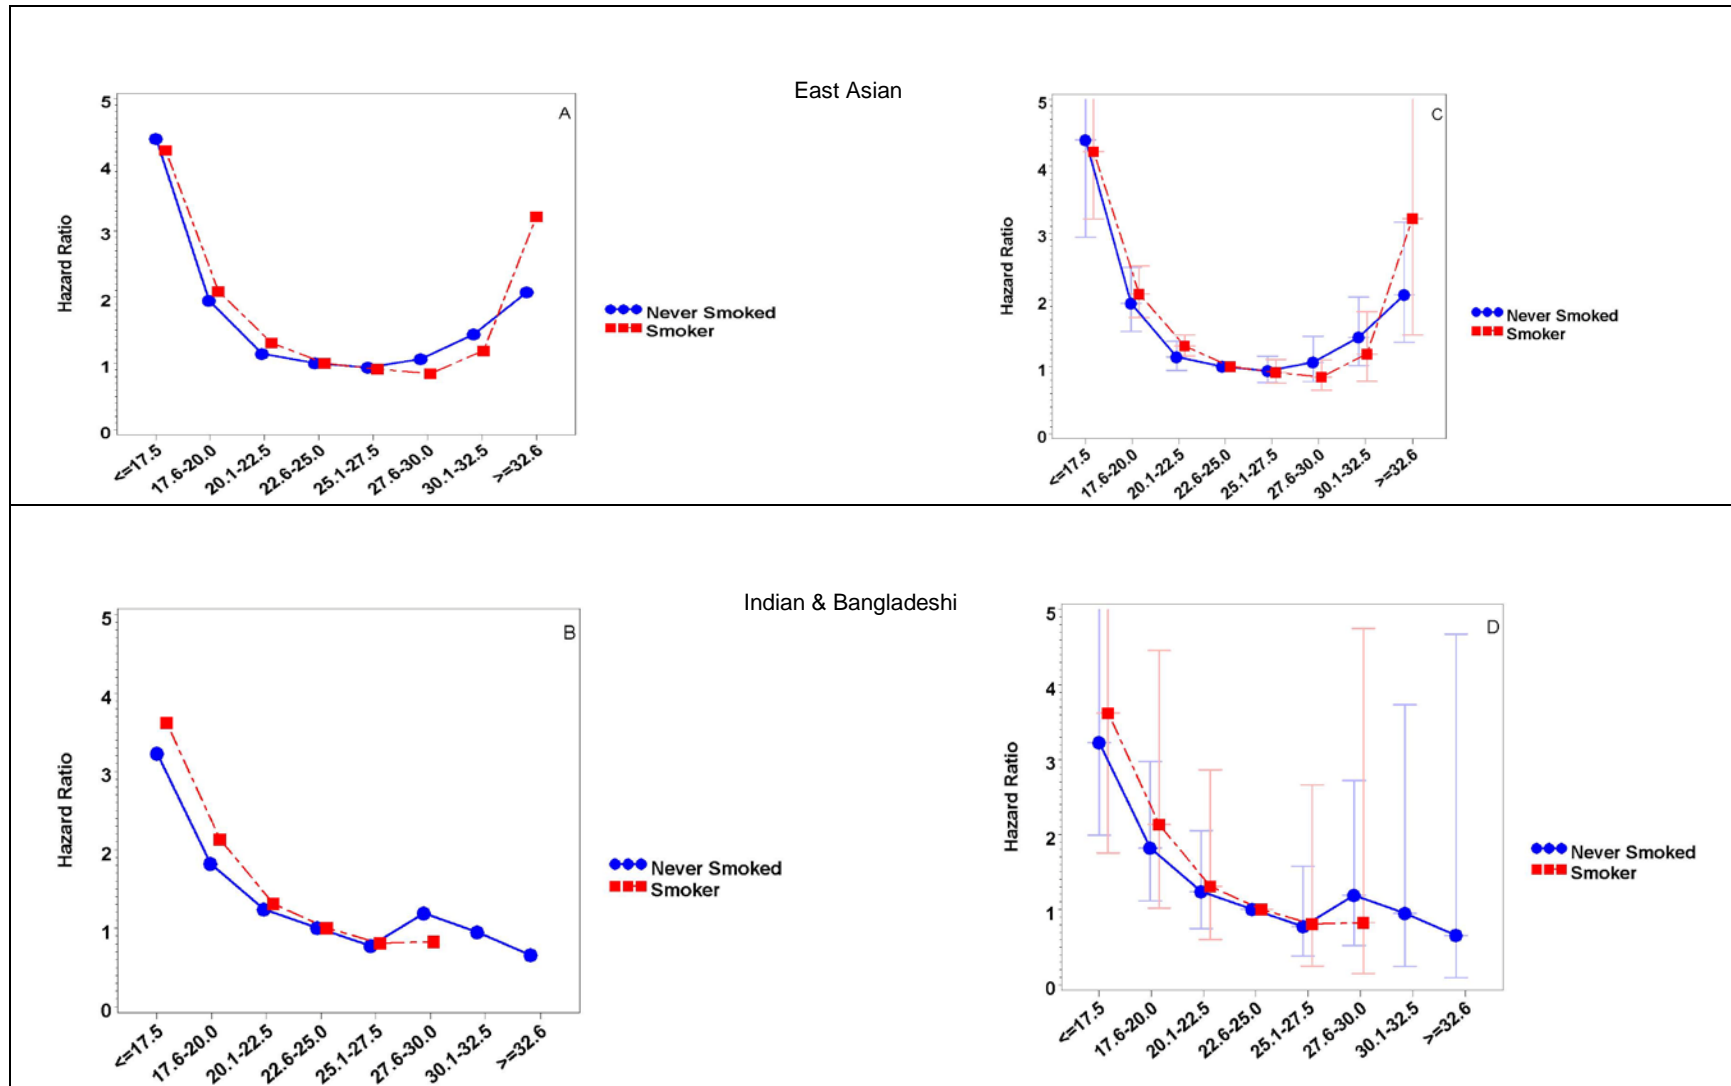

Table S5. Associations between BMI and total and cause-specific mortality: Comparison of results between the ACC and the study of Jee et al. (male never-smokers)

|                                   | <b>Body mass index (BMI) at baseline</b> |                     |                     |                     |                     |                     |                     |                     |                     |                     |
|-----------------------------------|------------------------------------------|---------------------|---------------------|---------------------|---------------------|---------------------|---------------------|---------------------|---------------------|---------------------|
|                                   | <18.5                                    | 18.5-19.9           | 20.0-21.4           | 21.5-22.9           | 23.0-24.9           | 25.0-26.4           | 26.5-27.9           | 28.0-29.9           | 30.0-31.9           | ≥32.0               |
| <b>Total Mortality</b>            |                                          |                     |                     |                     |                     |                     |                     |                     |                     |                     |
| East Asian <sup>c</sup>           |                                          |                     |                     |                     |                     |                     |                     |                     |                     |                     |
| No. of deaths                     | 859                                      | 1194                | 1737                | 2010                | 2565                | 1253                | 808                 | 559                 | 231                 | 138                 |
| HR (95% CI) <sup>a</sup>          | 1.54<br>(1.29,1.83)                      | 1.23<br>(1.06,1.43) | 1.07<br>(0.98,1.17) | 1.00<br>(0.94,1.07) | 1.00<br>(reference) | 0.98<br>(0.91,1.05) | 1.05<br>(0.96,1.15) | 1.19<br>(1.03,1.37) | 1.51<br>(1.19,1.90) | 1.75<br>(1.41,2.17) |
| Indian & Bangladeshi <sup>c</sup> |                                          |                     |                     |                     |                     |                     |                     |                     |                     |                     |
| No. of deaths                     | 951                                      | 790                 | 876                 | 815                 | 861                 | 369                 | 256                 | 157                 | 80                  | 68                  |
| HR (95% CI) <sup>a</sup>          | 1.45<br>(1.18,1.78)                      | 1.24<br>(1.00,1.54) | 1.12<br>(0.91,1.37) | 1.04<br>(0.85,1.29) | 1.00<br>(reference) | 0.88<br>(0.68,1.16) | 1.05<br>(0.77,1.42) | 0.97<br>(0.67,1.41) | 1.17<br>(0.71,1.93) | 1.58<br>(0.92,2.72) |
| Jee et al <sup>b</sup>            |                                          |                     |                     |                     |                     |                     |                     |                     |                     |                     |
| No. of deaths                     | 414                                      | 812                 | 1423                | 1912                | 2568                | 1308                | 697                 | 370                 | 111                 | 42                  |
| HR (95% CI) <sup>a</sup>          | 1.3<br>(1.2,1.4)                         | 1.1<br>(1.0,1.2)    | 1.0<br>(1.0,1.1)    | 1.0<br>(0.9,1.1)    | 1.0<br>(reference)  | 1.0<br>(0.9,1.1)    | 1.1<br>(1.0,1.2)    | 1.1<br>(1.0,1.3)    | 1.5<br>(1.3,1.9)    | 2.5<br>(1.8,3.5)    |
| <b>Cancer Mortality</b>           |                                          |                     |                     |                     |                     |                     |                     |                     |                     |                     |
| East Asian                        |                                          |                     |                     |                     |                     |                     |                     |                     |                     |                     |
| No. of deaths                     | 171                                      | 274                 | 482                 | 580                 | 727                 | 327                 | 227                 | 153                 | 63                  | 43                  |
| HR (95% CI) <sup>a</sup>          | 1.11<br>(0.89,1.38)                      | 1.04<br>(0.83,1.30) | 1.03<br>(0.90,1.17) | 1.00<br>(0.89,1.13) | 1.00<br>(reference) | 0.95<br>(0.82,1.10) | 1.12<br>(0.95,1.33) | 1.28<br>(1.06,1.56) | 1.53<br>(1.14,2.03) | 2.37<br>(1.68,3.34) |
| Indian & Bangladeshi <sup>c</sup> |                                          |                     |                     |                     |                     |                     |                     |                     |                     |                     |
| No. of deaths                     | 51                                       | 37                  | 48                  | 60                  | 62                  | 23                  | 13                  | 14                  | 5                   | 2                   |
| HR (95% CI) <sup>a</sup>          | 1.05<br>(0.46,2.42)                      | 0.81<br>(0.33,1.98) | 0.85<br>(0.37,1.96) | 1.06<br>(0.48,2.31) | 1.00<br>(reference) | 0.77<br>(0.27,2.21) | 0.75<br>(0.20,2.81) | 1.25<br>(0.35,4.46) | NA                  | NA                  |
| Jee et al <sup>b</sup>            |                                          |                     |                     |                     |                     |                     |                     |                     |                     |                     |
| No. of deaths                     | 101                                      | 263                 | 475                 | 627                 | 899                 | 495                 | 255                 | 133                 | 41                  | 14                  |
| HR (95% CI) <sup>a</sup>          | 0.9<br>(0.7,1.2)                         | 1.1<br>(0.9,1.2)    | 1.1<br>(0.9,1.1)    | 1.0<br>(0.9,1.1)    | 1.0<br>(reference)  | 1.1<br>(1.0,1.2)    | 1.2<br>(1.0,1.3)    | 1.2<br>(1.0,1.5)    | 1.7<br>(1.2,2.3)    | 2.5<br>(1.4,4.3)    |
| <b>CVD Mortality</b>              |                                          |                     |                     |                     |                     |                     |                     |                     |                     |                     |
| East Asian                        |                                          |                     |                     |                     |                     |                     |                     |                     |                     |                     |
| No. of deaths                     | 286                                      | 396                 | 551                 | 629                 | 857                 | 453                 | 282                 | 217                 | 87                  | 57                  |
| HR (95% CI) <sup>a</sup>          | 1.17<br>(0.86,1.59)                      | 1.10<br>(0.85,1.41) | 0.99<br>(0.82,1.19) | 0.93<br>(0.81,1.07) | 1.00<br>(reference) | 1.06<br>(0.93,1.20) | 1.08<br>(0.93,1.25) | 1.26<br>(1.07,1.49) | 1.97<br>(1.19,3.25) | 1.75<br>(1.30,2.37) |



|                                   |                     |                     |                     |                     |                     |                     |                     |                     |                     |                     |
|-----------------------------------|---------------------|---------------------|---------------------|---------------------|---------------------|---------------------|---------------------|---------------------|---------------------|---------------------|
| Indian & Bangladeshi <sup>c</sup> |                     |                     |                     |                     |                     |                     |                     |                     |                     |                     |
| No. of deaths                     | 259                 | 254                 | 316                 | 301                 | 337                 | 168                 | 108                 | 67                  | 39                  | 23                  |
| HR (95% CI) <sup>a</sup>          | 0.97<br>(0.68,1.39) | 0.99<br>(0.69,1.42) | 1.01<br>(0.72,1.42) | 0.97<br>(0.69,1.37) | 1.00<br>(reference) | 1.03<br>(0.68,1.55) | 1.13<br>(0.70,1.82) | 1.09<br>(0.61,1.94) | 1.50<br>(0.72,3.11) | 1.41<br>(0.56,3.59) |
| Jee et al <sup>b</sup>            |                     |                     |                     |                     |                     |                     |                     |                     |                     |                     |
| No. of deaths                     | 48                  | 120                 | 249                 | 312                 | 526                 | 254                 | 175                 | 102                 | 33                  | 15                  |
| HR (95% CI) <sup>a</sup>          | 0.7<br>(0.5,0.9)    | 0.8<br>(0.6,1.0)    | 0.9<br>(0.7,1.0)    | 0.8<br>(0.7,0.9)    | 1.0<br>(reference)  | 0.9<br>(0.8,1.1)    | 1.3<br>(1.1,1.6)    | 1.5<br>(1.2,1.9)    | 2.1<br>(1.5,3.0)    | 4.1<br>(2.4,7.2)    |

### Respiratory Disease Mortality

|                                   |                     |                     |                     |                     |                     |                     |                     |                     |                     |                     |
|-----------------------------------|---------------------|---------------------|---------------------|---------------------|---------------------|---------------------|---------------------|---------------------|---------------------|---------------------|
| East Asian                        |                     |                     |                     |                     |                     |                     |                     |                     |                     |                     |
| No. of deaths                     | 125                 | 122                 | 153                 | 171                 | 187                 | 79                  | 59                  | 27                  | 13                  | 7                   |
| HR (95% CI) <sup>a</sup>          | 2.73<br>(2.04,3.65) | 1.85<br>(1.24,2.76) | 1.18<br>(0.92,1.50) | 1.06<br>(0.84,1.33) | 1.00<br>(reference) | 0.95<br>(0.70,1.28) | 1.35<br>(0.97,1.88) | 1.07<br>(0.67,1.72) | 2.03<br>(0.95,4.34) | 1.96<br>(0.70,5.47) |
| Indian & Bangladeshi <sup>c</sup> |                     |                     |                     |                     |                     |                     |                     |                     |                     |                     |
| No. of deaths                     | 113                 | 91                  | 70                  | 53                  | 43                  | 21                  | 8                   | 7                   | 3                   | 3                   |
| HR (95% CI) <sup>a</sup>          | 2.99<br>(1.37,6.53) | 2.59<br>(1.16,5.77) | 1.70<br>(0.74,3.91) | 1.33<br>(0.55,3.24) | 1.00<br>(reference) | 1.02<br>(0.32,3.20) | 0.71<br>(0.13,3.80) | 0.94<br>(0.16,5.49) | NA                  | NA                  |
| Jee et al <sup>b</sup>            |                     |                     |                     |                     |                     |                     |                     |                     |                     |                     |
| No. of deaths                     | 70                  | 73                  | 71                  | 69                  | 64                  | 25                  | 14                  | 2                   | 1                   | 0                   |
| HR (95% CI) <sup>a</sup>          | 6.0<br>(4.2,8.7)    | 3.2<br>(2.3,4.6)    | 1.8<br>(1.3,2.6)    | 1.4<br>(1.0,2.0)    | 1.0<br>(reference)  | 0.7<br>(0.4,1.2)    | 0.7<br>(0.4,1.4)    | 0.2<br>(0.1,0.9)    | NA                  | NA                  |

<sup>a</sup> Adjusted for age, alcohol use, and baseline comorbid conditions and excluded subjects with a BMI < 16 Kg/m<sup>2</sup> or height ≤ 130cm and subjects with < 2 years of follow-up

<sup>b</sup> Jee SH et al. Body-mass index and mortality in Korean men and women. N Engl J Med 2006; 355:779-87

<sup>c</sup> East Asians include Chinese, Koreans and Japanese. South Asians include Indians and Bangladeshis.

Table S6. Associations between BMI and total and cause-specific mortality: Comparison of results between the ACC and the study of Jee et al. (male ever-smokers)

|                                   | <b>Body mass index (BMI) at baseline</b> |                     |                     |                     |                     |                     |                     |                     |                     |                     |
|-----------------------------------|------------------------------------------|---------------------|---------------------|---------------------|---------------------|---------------------|---------------------|---------------------|---------------------|---------------------|
|                                   | <18.5                                    | 18.5-19.9           | 20.0-21.4           | 21.5-22.9           | 23.0-24.9           | 25.0-26.4           | 26.5-27.9           | 28.0-29.9           | 30.0-31.9           | ≥32.0               |
| <b>Total Mortality</b>            |                                          |                     |                     |                     |                     |                     |                     |                     |                     |                     |
| East Asian <sup>c</sup>           |                                          |                     |                     |                     |                     |                     |                     |                     |                     |                     |
| No. of deaths                     | 3705                                     | 5218                | 6992                | 7268                | 7608                | 3176                | 1901                | 1078                | 381                 | 206                 |
| HR (95% CI) <sup>a</sup>          | 1.75<br>(1.55,1.96)                      | 1.42<br>(1.33,1.51) | 1.21<br>(1.01,1.27) | 1.12<br>(1.08,1.17) | 1.00<br>(reference) | 0.96<br>(0.92,1.01) | 1.03<br>(0.97,1.09) | 1.04<br>(0.97,1.11) | 1.17<br>(1.03,1.33) | 1.52<br>(1.30,1.77) |
| Indian & Bangladeshi <sup>c</sup> |                                          |                     |                     |                     |                     |                     |                     |                     |                     |                     |
| No. of deaths                     | 1571                                     | 882                 | 854                 | 668                 | 632                 | 271                 | 156                 | 107                 | 41                  | 23                  |
| HR (95% CI) <sup>a</sup>          | 1.50<br>(1.22,1.85)                      | 1.24<br>(0.99,1.55) | 1.21<br>(0.97,1.52) | 1.08<br>(0.85,1.37) | 1.00<br>(reference) | 0.97<br>(0.71,1.33) | 0.99<br>(0.67,1.46) | 1.02<br>(0.65,1.60) | 1.05<br>(0.52,2.11) | 0.92<br>(0.37,2.30) |
| Jee et al <sup>b</sup>            |                                          |                     |                     |                     |                     |                     |                     |                     |                     |                     |
| No. of deaths                     | 3247                                     | 5679                | 9318                | 10,106              | 11,418              | 4996                | 2399                | 1094                | 288                 | 110                 |
| HR (95% CI) <sup>a</sup>          | 1.4<br>(1.3,1.4)                         | 1.2<br>(1.1,1.2)    | 1.2<br>(1.1,1.2)    | 1.1<br>(1.1,1.1)    | 1.0<br>(reference)  | 1.0<br>(0.9,1.0)    | 1.0<br>(0.9,1.0)    | 1.0<br>(1.0,1.1)    | 1.1<br>(1.0,1.3)    | 2.1<br>(1.7,2.5)    |
| <b>Cancer Mortality</b>           |                                          |                     |                     |                     |                     |                     |                     |                     |                     |                     |
| East Asian                        |                                          |                     |                     |                     |                     |                     |                     |                     |                     |                     |
| No. of deaths                     | 1053                                     | 1725                | 2482                | 2529                | 2581                | 1012                | 580                 | 339                 | 113                 | 53                  |
| HR (95% CI) <sup>a</sup>          | 1.44<br>(1.28,1.63)                      | 1.36<br>(1.24,1.49) | 1.22<br>(1.15,1.30) | 1.12<br>(1.06,1.19) | 1.00<br>(reference) | 0.95<br>(0.87,1.03) | 0.99<br>(0.90,1.09) | 1.08<br>(0.95,1.23) | 1.13<br>(0.87,1.46) | 1.46<br>(1.08,1.97) |
| Indian & Bangladeshi              |                                          |                     |                     |                     |                     |                     |                     |                     |                     |                     |
| No. of deaths                     | 185                                      | 101                 | 81                  | 58                  | 64                  | 21                  | 25                  | 9                   | 5                   | 1                   |
| HR (95% CI) <sup>a</sup>          | 1.51<br>(0.79,2.88)                      | 1.24<br>(0.61,2.51) | 1.02<br>(0.48,2.16) | 0.91<br>(0.41,2.03) | 1.00<br>(reference) | 0.80<br>(0.27,2.39) | 1.65<br>(0.59,4.62) | 1.05<br>(0.22,4.96) | NA                  | NA                  |
| Jee et al <sup>b</sup>            |                                          |                     |                     |                     |                     |                     |                     |                     |                     |                     |
| No. of deaths                     | 1064                                     | 2034                | 3600                | 3993                | 4689                | 2016                | 984                 | 417                 | 112                 | 37                  |
| HR (95% CI) <sup>a</sup>          | 1.1<br>(1.0,1.2)                         | 1.1<br>(1.0,1.1)    | 1.1<br>(1.1,1.2)    | 1.0<br>(1.0,1.1)    | 1.0<br>(reference)  | 0.9<br>(0.9,1.0)    | 1.0<br>(0.9,1.0)    | 1.0<br>(0.9,1.1)    | 1.1<br>(0.9,1.3)    | 1.6<br>(1.2,2.3)    |
| <b>CVD Mortality</b>              |                                          |                     |                     |                     |                     |                     |                     |                     |                     |                     |
| East Asian                        |                                          |                     |                     |                     |                     |                     |                     |                     |                     |                     |
| No. of deaths                     | 971                                      | 1324                | 1778                | 1899                | 2095                | 899                 | 596                 | 314                 | 126                 | 76                  |
| HR (95% CI) <sup>a</sup>          | 1.36<br>(1.12,1.65)                      | 1.17<br>(1.05,1.30) | 1.09<br>(1.01,1.17) | 1.05<br>(0.98,1.13) | 1.00<br>(reference) | 0.99<br>(0.90,1.09) | 1.13<br>(0.02,1.25) | 1.07<br>(0.94,1.22) | 1.26<br>(.103,1.53) | 1.84<br>(1.40,2.42) |

|                          |                     |                     |                     |                     |                     |                     |                     |                     |                     |                     |
|--------------------------|---------------------|---------------------|---------------------|---------------------|---------------------|---------------------|---------------------|---------------------|---------------------|---------------------|
| Indian & Bangladeshi     |                     |                     |                     |                     |                     |                     |                     |                     |                     |                     |
| No. of deaths            | 434                 | 281                 | 320                 | 271                 | 276                 | 119                 | 59                  | 46                  | 17                  | 10                  |
| HR (95% CI) <sup>a</sup> | 0.89<br>(0.63,1.25) | 0.89<br>(0.61,1.28) | 1.02<br>(0.72,1.46) | 0.98<br>(0.68,1.43) | 1.00<br>(reference) | 1.01<br>(0.63,1.62) | 0.89<br>(0.48,1.65) | 1.03<br>(0.51,2.06) | 1.14<br>(0.38,3.40) | 1.11<br>(0.28,4.45) |
| Jee et al <sup>b</sup>   |                     |                     |                     |                     |                     |                     |                     |                     |                     |                     |
| No. of deaths            | 447                 | 882                 | 1472                | 1742                | 2201                | 1040                | 520                 | 256                 | 68                  | 24                  |
| HR (95% CI) <sup>a</sup> | 0.9<br>(0.7,0.9)    | 0.9<br>(0.8,0.9)    | 0.9<br>(0.9,1.0)    | 1.0<br>(0.9,1.0)    | 1.0<br>(reference)  | 1.1<br>(1.0,1.2)    | 1.1<br>(1.0,1.2)    | 1.3<br>(1.1,1.5)    | 1.4<br>(1.1,1.8)    | 2.4<br>(1.6,3.6)    |

### Respiratory Disease Mortality

|                          |                     |                     |                     |                     |                     |                     |                     |                     |                     |                     |
|--------------------------|---------------------|---------------------|---------------------|---------------------|---------------------|---------------------|---------------------|---------------------|---------------------|---------------------|
| East Asian               |                     |                     |                     |                     |                     |                     |                     |                     |                     |                     |
| No. of deaths            | 558                 | 601                 | 658                 | 650                 | 585                 | 207                 | 99                  | 57                  | 22                  | 16                  |
| HR (95% CI) <sup>a</sup> | 3.24<br>(2.63,3.98) | 2.01<br>(1.76,2.28) | 1.44<br>(1.27,1.74) | 1.24<br>(1.09,1.40) | 1.00<br>(reference) | 0.95<br>(0.76,1.17) | 0.86<br>(0.67,1.10) | 0.97<br>(0.70,1.34) | 1.43<br>(0.89,2.30) | 3.16<br>(1.55,6.47) |
| Indian & Bangladeshi     |                     |                     |                     |                     |                     |                     |                     |                     |                     |                     |
| No. of deaths            | 259                 | 107                 | 79                  | 52                  | 44                  | 19                  | 5                   | 6                   | 0                   | 0                   |
| HR (95% CI) <sup>a</sup> | 2.93<br>(1.40,6.11) | 2.03<br>(0.92,4.50) | 1.56<br>(0.69,3.55) | 1.21<br>(0.50,2.93) | 1.00<br>(reference) | 0.99<br>(0.30,3.25) | NA                  | NA                  | NA                  | NA                  |
| Jee et al <sup>b</sup>   |                     |                     |                     |                     |                     |                     |                     |                     |                     |                     |
| No. of deaths            | 399                 | 390                 | 449                 | 347                 | 311                 | 115                 | 33                  | 5                   | 4                   | 0                   |
| HR (95% CI) <sup>a</sup> | 4.5<br>(3.8,5.3)    | 2.4<br>(2.1,2.9)    | 2.0<br>(1.7,2.3)    | 1.4<br>(1.2,1.6)    | 1.0<br>(reference)  | 0.8<br>(0.7,1.0)    | 0.5<br>(0.3,0.7)    | 0.2<br>(0.1,0.4)    | NA                  | NA                  |

<sup>a</sup> Adjusted for age, alcohol use, and baseline comorbid conditions and excluded subjects with a BMI < 16 Kg/m<sup>2</sup> or height ≤ 130cm and subjects with < 2 years of follow-up

<sup>b</sup> Jee SH et al. Body-mass index and mortality in Korean men and women. N Engl J Med 2006; 355:779-87

<sup>c</sup> East Asians include Chinese, Koreans and Japanese. South Asians include Indians and Bangladeshis.

Table S7. Associations between BMI and total and cause-specific mortality: Comparison of results between the ACC and the study of Jee et al. (female never-smokers)

|                                             | <b>Body mass index (BMI) at baseline</b> |                     |                     |                     |                     |                     |                     |                     |                     |                     |
|---------------------------------------------|------------------------------------------|---------------------|---------------------|---------------------|---------------------|---------------------|---------------------|---------------------|---------------------|---------------------|
|                                             | <18.5                                    | 18.5-19.9           | 20.0-21.4           | 21.5-22.9           | 23.0-24.9           | 25.0-26.4           | 26.5-27.9           | 28.0-29.9           | 30.0-31.9           | ≥32.0               |
| <b>Total Mortality</b>                      |                                          |                     |                     |                     |                     |                     |                     |                     |                     |                     |
| <b>East Asian<sup>c</sup></b>               |                                          |                     |                     |                     |                     |                     |                     |                     |                     |                     |
| No. of deaths                               | 2353                                     | 2677                | 3642                | 4153                | 5860                | 2882                | 2043                | 1530                | 700                 | 551                 |
| HR (95% CI) <sup>a</sup>                    | 1.55<br>(1.40,1.72)                      | 1.23<br>(1.11,1.36) | 1.04<br>(0.96,1.13) | 1.02<br>(0.97,1.06) | 1.00<br>(reference) | 0.99<br>(0.93,1.06) | 1.05<br>(0.98,1.12) | 1.05<br>(0.99,1.12) | 1.18<br>(1.05,1.33) | 1.38<br>(1.24,1.53) |
| <b>Indian &amp; Bangladeshi<sup>c</sup></b> |                                          |                     |                     |                     |                     |                     |                     |                     |                     |                     |
| No. of deaths                               | 1136                                     | 802                 | 825                 | 691                 | 721                 | 400                 | 272                 | 212                 | 131                 | 99                  |
| HR (95% CI) <sup>a</sup>                    | 1.44<br>(1.17,1.78)                      | 1.29<br>(1.03,1.61) | 1.18<br>(0.95,1.47) | 1.04<br>(0.83,1.31) | 1.00<br>(reference) | 0.97<br>(0.74,1.26) | 0.93<br>(0.69,1.27) | 0.83<br>(0.59,1.17) | 0.98<br>(0.65,1.48) | 0.84<br>(0.53,1.33) |
| <b>Jee et al<sup>b</sup></b>                |                                          |                     |                     |                     |                     |                     |                     |                     |                     |                     |
| No. of deaths                               | 1015                                     | 1649                | 2558                | 3168                | 4340                | 2390                | 1606                | 1158                | 426                 | 248                 |
| HR (95% CI) <sup>a</sup>                    | 1.2<br>(1.1,1.3)                         | 1.1<br>(1.0,1.1)    | 1.0<br>(1.0,1.0)    | 1.0<br>(1.0,1.1)    | 1.0<br>(reference)  | 1.0<br>(0.9,1.0)    | 1.0<br>(1.0,1.1)    | 1.1<br>(1.1,1.2)    | 1.2<br>(1.1,1.3)    | 1.2<br>(1.1,1.4)    |
| <b>Cancer Mortality</b>                     |                                          |                     |                     |                     |                     |                     |                     |                     |                     |                     |
| <b>East Asian</b>                           |                                          |                     |                     |                     |                     |                     |                     |                     |                     |                     |
| No. of deaths                               | 439                                      | 628                 | 949                 | 1194                | 1760                | 877                 | 586                 | 449                 | 181                 | 143                 |
| HR (95% CI) <sup>a</sup>                    | 1.11<br>(0.97,1.28)                      | 1.01<br>(0.91,1.12) | 0.92<br>(0.84,1.01) | 0.97<br>(0.89,1.06) | 1.00<br>(reference) | 1.06<br>(0.97,1.16) | 1.06<br>(0.95,1.17) | 1.13<br>(0.99,1.29) | 1.12<br>(0.94,1.35) | 1.33<br>(1.10,1.62) |
| <b>Indian &amp; Bangladeshi</b>             |                                          |                     |                     |                     |                     |                     |                     |                     |                     |                     |
| No. of deaths                               | 91                                       | 76                  | 82                  | 70                  | 92                  | 47                  | 28                  | 23                  | 14                  | 7                   |
| HR (95% CI) <sup>a</sup>                    | 0.92<br>(0.48,1.77)                      | 0.98<br>(0.59,1.94) | 0.96<br>(0.50,1.87) | 0.85<br>(0.43,1.69) | 1.00<br>(reference) | 0.92<br>(0.42,2.01) | 0.78<br>(0.30,1.97) | 0.71<br>(0.26,1.95) | 0.85<br>(0.25,2.94) | NA                  |
| <b>Jee et al<sup>b</sup></b>                |                                          |                     |                     |                     |                     |                     |                     |                     |                     |                     |
| No. of deaths                               | 254                                      | 496                 | 688                 | 978                 | 1415                | 781                 | 536                 | 387                 | 137                 | 69                  |
| HR (95% CI) <sup>a</sup>                    | 1.0<br>(0.9,1.1)                         | 1.0<br>(0.9,1.1)    | 0.8<br>(0.7,0.9)    | 0.9<br>(0.9,1.0)    | 1.0<br>(reference)  | 1.0<br>(0.9,1.1)    | 1.1<br>(1.0,1.2)    | 1.2<br>(1.1,1.3)    | 1.2<br>(1.0,1.4)    | 1.2<br>(1.0,1.6)    |
| <b>CVD Mortality</b>                        |                                          |                     |                     |                     |                     |                     |                     |                     |                     |                     |
| <b>East Asian</b>                           |                                          |                     |                     |                     |                     |                     |                     |                     |                     |                     |
| No. of deaths                               | 758                                      | 828                 | 1041                | 1172                | 1702                | 757                 | 553                 | 432                 | 242                 | 192                 |
| HR (95% CI) <sup>a</sup>                    | 1.37<br>(1.20,1.56)                      | 1.19<br>(0.96,1.48) | 0.98<br>(0.86,1.11) | 0.99<br>(0.91,1.08) | 1.00<br>(reference) | 0.94<br>(0.84,1.05) | 0.99<br>(0.89,1.11) | 1.00<br>(0.89,1.13) | 1.31<br>(1.07,1.61) | 1.43<br>(1.19,1.71) |

|                          |                     |                     |                     |                     |                     |                     |                     |                     |                     |                     |
|--------------------------|---------------------|---------------------|---------------------|---------------------|---------------------|---------------------|---------------------|---------------------|---------------------|---------------------|
| Indian & Bangladeshi     |                     |                     |                     |                     |                     |                     |                     |                     |                     |                     |
| No. of deaths            | 341                 | 252                 | 301                 | 246                 | 276                 | 152                 | 106                 | 81                  | 54                  | 39                  |
| HR (95% CI) <sup>a</sup> | 1.18<br>(0.83,1.68) | 1.07<br>(0.73,1.57) | 1.13<br>(0.79,1.62) | 0.98<br>(0.67,1.43) | 1.00<br>(reference) | 0.95<br>(0.62,1.47) | 0.96<br>(0.58,1.57) | 0.84<br>(0.48,1.45) | 1.04<br>(0.54,1.99) | 0.87<br>(0.42,1.83) |
| Jee et al <sup>b</sup>   |                     |                     |                     |                     |                     |                     |                     |                     |                     |                     |
| No. of deaths            | 189                 | 318                 | 595                 | 754                 | 1076                | 624                 | 411                 | 308                 | 126                 | 67                  |
| HR (95% CI) <sup>a</sup> | 0.8<br>(0.7,1.0)    | 0.8<br>(0.7,0.9)    | 0.9<br>(0.8,1.0)    | 1.0<br>(0.9,1.1)    | 1.0<br>(reference)  | 1.0<br>(0.9,1.1)    | 1.1<br>(0.9,1.2)    | 1.2<br>(1.0,1.4)    | 1.4<br>(1.1,1.7)    | 1.4<br>(1.1,1.8)    |

### Respiratory Disease Mortality

|                          |                     |                     |                     |                     |                     |                     |                     |                     |                     |                     |
|--------------------------|---------------------|---------------------|---------------------|---------------------|---------------------|---------------------|---------------------|---------------------|---------------------|---------------------|
| East Asian               |                     |                     |                     |                     |                     |                     |                     |                     |                     |                     |
| No. of deaths            | 234                 | 205                 | 244                 | 240                 | 348                 | 110                 | 84                  | 60                  | 35                  | 30                  |
| HR (95% CI) <sup>a</sup> | 3.14<br>(2.09,4.73) | 1.74<br>(1.32,2.30) | 1.38<br>(1.03,1.85) | 1.13<br>(0.89,1.45) | 1.00<br>(reference) | 0.86<br>(0.61,1.23) | 1.03<br>(0.69,1.52) | 1.05<br>(0.74,1.50) | 1.42<br>(0.95,2.13) | 1.87<br>(1.22,2.86) |
| Indian & Bangladeshi     |                     |                     |                     |                     |                     |                     |                     |                     |                     |                     |
| No. of deaths            | 160                 | 103                 | 65                  | 66                  | 66                  | 30                  | 25                  | 23                  | 8                   | 5                   |
| HR (95% CI) <sup>a</sup> | 2.03<br>(1.07,3.87) | 1.70<br>(0.85,3.39) | 0.96<br>(0.45,2.05) | 1.07<br>(0.50,2.26) | 1.00<br>(reference) | 0.81<br>(0.31,2.10) | 0.98<br>(0.35,2.70) | 1.07<br>(0.38,3.07) | NA                  | NA                  |
| Jee et al <sup>b</sup>   |                     |                     |                     |                     |                     |                     |                     |                     |                     |                     |
| No. of deaths            | 62                  | 70                  | 92                  | 98                  | 122                 | 66                  | 32                  | 22                  | 7                   | 0                   |
| HR (95% CI) <sup>a</sup> | 1.8<br>(1.3,2.6)    | 1.4<br>(1.0,1.9)    | 1.2<br>(0.9,1.6)    | 1.1<br>(0.8,1.4)    | 1.0<br>(reference)  | 1.0<br>(0.7,1.3)    | 0.8<br>(0.5,1.1)    | 0.7<br>(0.4,1.1)    | NA                  | NA                  |

<sup>a</sup> Adjusted for age, alcohol use, and baseline comorbid conditions and excluded subjects with a BMI < 16 Kg/m<sup>2</sup> or height ≤ 130cm and subjects with < 2 years of follow-up

<sup>b</sup> Jee SH et al. Body-mass index and mortality in Korean men and women. N Engl J Med 2006; 355:779-87

<sup>c</sup> East Asians include Chinese, Koreans and Japanese. South Asians include Indians and Bangladeshis.

Table S8: Characteristics of Participating Cohorts in the Asia Cohort Consortium BMI Project according to availability of CHD data at baseline

| Baseline CHD data <sup>d</sup> | No of subjects | Study entry | Years of follow-up <sup>a</sup> | Age at entry <sup>a</sup> | BMI <sup>a</sup>        | Female (%) | Ever smokers (%) | No of deaths | Cancer death (%) <sup>c</sup> | CVD death (%) <sup>c</sup> | Other death (%) <sup>c</sup> |
|--------------------------------|----------------|-------------|---------------------------------|---------------------------|-------------------------|------------|------------------|--------------|-------------------------------|----------------------------|------------------------------|
| East Asia                      |                |             |                                 |                           |                         |            |                  |              |                               |                            |                              |
| Not available                  | 66,323         | 1985-2004   | 11.6                            | 55.8                      | 22.5 (3.1) <sup>b</sup> | 40.1       | 49.1             | 12,049       | 35.3                          | 33.4                       | 31.3                         |
| Available                      | 787,917        | 1984-2006   | 10.1                            | 55.2                      | 23.3 (3.3) <sup>b</sup> | 55.1       | 36.7             | 84,636       | 34.5                          | 34.8                       | 30.7                         |
| India & Bangladesh             |                |             |                                 |                           |                         |            |                  |              |                               |                            |                              |
| Not available                  | 146,820        | 1991-1997   | 5.2                             | 50.8                      | 22.3 (4.2) <sup>b</sup> | 40.4       | 18.9             | 13,001       | 8.7                           | 43.8                       | 47.5                         |
| Available                      | 140,549        | 1995-2002   | 7.4                             | 48.4                      | 21.6 (4.0) <sup>b</sup> | 61.2       | 24.5             | 11,072       | 11.9                          | 37.6                       | 50.5                         |
| Total                          | 1,141,609      | 1984-2006   | 9.2                             | 53.9                      | 22.9 (3.6)              | 53.1       | 33.5             | 120,758      | 29.9                          | 35.7                       | 34.3                         |

<sup>a</sup> Mean (SD) for BMI and mean for other variables.

<sup>b</sup> BMI estimated using weight and height measured at enrollment in all South Asian cohorts. Some East Asian cohorts employed measured height and weight while other East Asian cohorts employed self-reported height and weight to obtain BMI.

<sup>c</sup> Excluding deaths with unknown causes.

<sup>d</sup> CHD, coronary heart disease.

Table S9. Hazard ratios (HR) for the association between BMI and total mortality by methods of BMI data collection: The Asia Cohort Consortium BMI Project (East Asians only)

| Methods to obtain weight/height data   | Body mass index (BMI) at baseline |                     |                     |                     |                     |                     |                     |                     |                     |                     |
|----------------------------------------|-----------------------------------|---------------------|---------------------|---------------------|---------------------|---------------------|---------------------|---------------------|---------------------|---------------------|
|                                        | ≤15.0                             | 15.1-17.5           | 17.6-20.0           | 20.1-22.5           | 22.6-25.0           | 25.1-27.5           | 27.6-30.0           | 30.1-32.5           | 32.6-35.0           | 35.1-50.0           |
| <b>All subjects<sup>a</sup></b>        |                                   |                     |                     |                     |                     |                     |                     |                     |                     |                     |
| Self-reported                          |                                   |                     |                     |                     |                     |                     |                     |                     |                     |                     |
| No. of deaths                          | 208                               | 2052                | 8444                | 14,176              | 14,802              | 6684                | 2511                | 845                 | 252                 | 151                 |
| HR (95% CI) <sup>b</sup>               | 1.95<br>(1.65,2.31)               | 1.83<br>(1.55,2.17) | 1.37<br>(1.22,1.53) | 1.10<br>(1.03,1.17) | 1.00<br>(reference) | 0.98<br>(0.94,1.03) | 1.06<br>(0.99,1.13) | 1.21<br>(1.08,1.36) | 1.61<br>(1.33,1.95) | 1.48<br>(1.22,1.78) |
| Measured                               |                                   |                     |                     |                     |                     |                     |                     |                     |                     |                     |
| No. of deaths                          | 248                               | 1743                | 5103                | 7024                | 6589                | 4325                | 2168                | 778                 | 232                 | 132                 |
| HR (95% CI) <sup>b</sup>               | 4.88<br>(1.57,15.21)              | 1.88<br>(1.59,2.23) | 1.33<br>(1.24,1.44) | 1.09<br>(1.03,1.17) | 1.00<br>(reference) | 0.98<br>(0.93,1.03) | 1.08<br>(0.97,1.21) | 1.16<br>(0.93,1.46) | 1.32<br>(1.11,1.56) | 1.53<br>(1.19,1.98) |
| <b>Ever smokers<sup>a</sup></b>        |                                   |                     |                     |                     |                     |                     |                     |                     |                     |                     |
| Self-reported                          |                                   |                     |                     |                     |                     |                     |                     |                     |                     |                     |
| No. of deaths                          | 85                                | 1112                | 4977                | 8314                | 7702                | 3182                | 1036                | 310                 | 78                  | 57                  |
| HR (95% CI) <sup>b</sup>               | 1.76<br>(1.29,2.39)               | 1.76<br>(1.51,2.06) | 1.41<br>(1.26,1.48) | 1.14<br>(1.07,1.21) | 1.00<br>(reference) | 0.97<br>(0.92,1.02) | 0.99<br>(0.92,1.07) | 1.14<br>(1.00,1.31) | 1.56<br>(1.09,2.24) | 1.67<br>(1.22,2.26) |
| Measured                               |                                   |                     |                     |                     |                     |                     |                     |                     |                     |                     |
| No. of deaths                          | 106                               | 878                 | 2613                | 3423                | 2748                | 1551                | 686                 | 221                 | 49                  | 25                  |
| HR (95% CI) <sup>b</sup>               | 5.27<br>(1.53,18.2)               | 1.92<br>(1.51,2.45) | 1.33<br>(1.20,1.49) | 1.15<br>(1.07,1.22) | 1.00<br>(reference) | 0.96<br>(0.89,1.04) | 1.05<br>(0.94,1.16) | 1.24<br>(1.01,1.42) | 1.20<br>(0.84,1.71) | 1.59<br>(0.78,3.24) |
| <b>Lifetime nonsmokers<sup>a</sup></b> |                                   |                     |                     |                     |                     |                     |                     |                     |                     |                     |
| Self-reported                          |                                   |                     |                     |                     |                     |                     |                     |                     |                     |                     |
| No. of deaths                          | 105                               | 759                 | 2808                | 4800                | 6098                | 2936                | 1237                | 462                 | 142                 | 72                  |
| HR (95% CI) <sup>b</sup>               | 2.15<br>(1.71,2.71)               | 1.75<br>(1.43,2.13) | 1.21<br>(1.05,1.40) | 1.00<br>(0.93,1.08) | 1.00<br>(reference) | 0.99<br>(0.91,1.09) | 1.11<br>(1.01,1.23) | 1.33<br>(1.12,1.59) | 1.60<br>(1.25,2.04) | 1.58<br>(1.09,2.28) |
| Measured                               |                                   |                     |                     |                     |                     |                     |                     |                     |                     |                     |
| No. of deaths                          | 142                               | 859                 | 2472                | 3566                | 3827                | 2768                | 1476                | 555                 | 183                 | 107                 |
| HR (95% CI) <sup>b</sup>               | 3.97<br>(1.94,8.09)               | 1.72<br>(1.52,1.95) | 1.29<br>(1.20,1.38) | 1.05<br>(0.99,1.12) | 1.00<br>(reference) | 1.00<br>(0.94,1.08) | 1.11<br>(0.94,1.32) | 1.19<br>(0.96,1.47) | 1.39<br>(1.15,1.68) | 1.55<br>(1.22,1.97) |

<sup>a</sup> Included in the analysis were all subjects / ever smokers / lifetime nonsmokers for self-reported (398,672 / 152,718 / 217,094) and measured BMI (380,865 / 117,327 / 262,398)

<sup>b</sup> Adjusted for age, gender, education, urban/rural resident, marital status, and baseline comorbidities and excluding subjects with less than three years of follow-up.
